# Supplementary material for: Regulating the photoluminescence and energy transfer process of Sr5(PO4)3Cl:Eu2+, Mn2+ via pressure-induced phase transition
Source: Royal Society of Chemistry journal article supplement (doi:10.1039/d2tc04740c), 2023-01-01
Supplement: d2tc04740c1.pdf [file d2tc04740c1.pdf]

## Supporting Information

### Regulating the photoluminescence and energy transfer process of $\text{Sr}_5(\text{PO}_4)_3\text{Cl}:\text{Eu}^{2+}, \text{Mn}^{2+}$ via pressure-induced phase transition

Ke Liu,<sup>a</sup> Ting Wen,<sup>\*a</sup> Chen Li,<sup>a</sup> Yingying Ma,<sup>a</sup> Dequan Jiang,<sup>b</sup> Binbin Yue<sup>a</sup> and Yonggang Wang<sup>\*b</sup>

<sup>a</sup>Center for High Pressure Science and Technology Advanced Research (HPSTAR), Beijing 100193, China.

<sup>b</sup>School of Materials Science and Engineering, Peking University, Beijing 100871, China.

\*E-mail: ting.wen@hpstar.ac.cn; ygw@pku.edu.cn

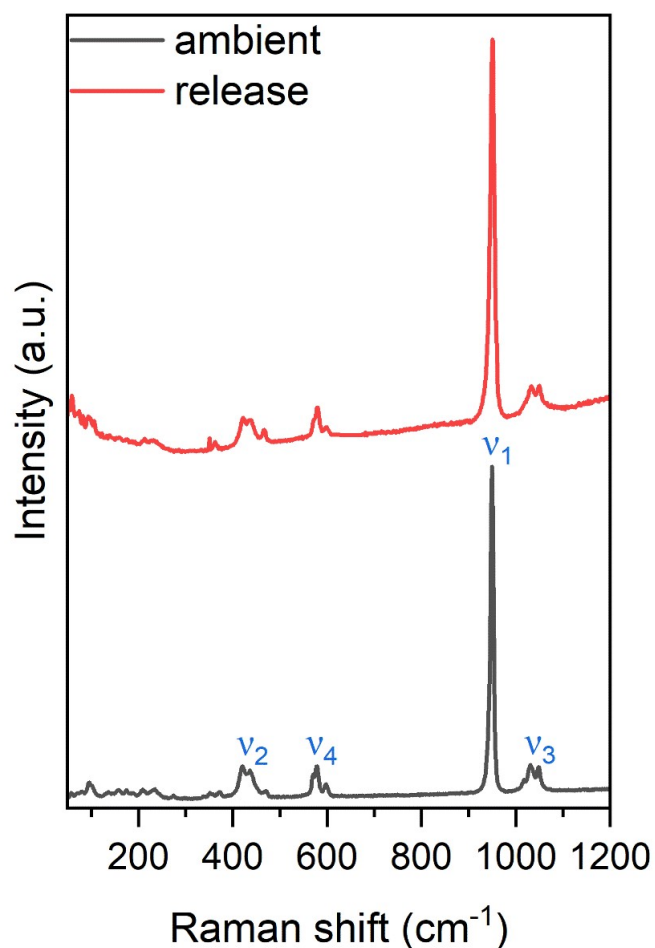

**Figure S1.** Raman spectra of  $\text{Sr}_5(\text{PO}_4)_3\text{Cl}$  at ambient condition and after releasing pressure.

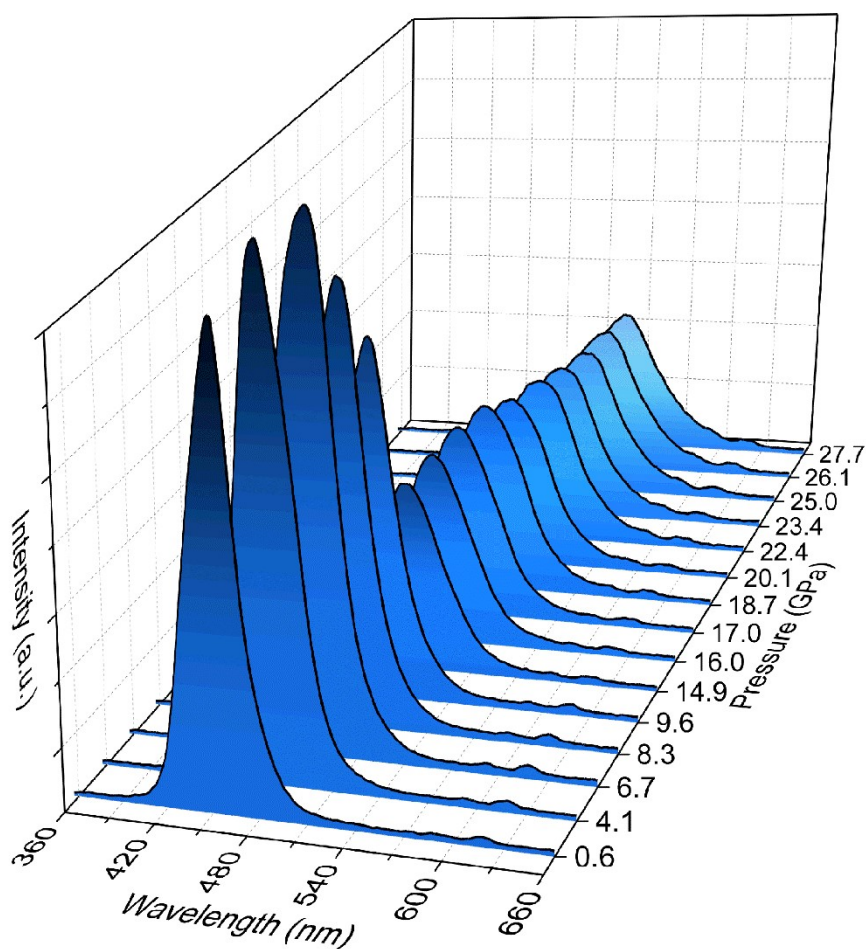

**Figure S2.** *in-situ* HP PL of  $\text{Sr}_5(\text{PO}_4)_3\text{Cl}: 0.02\text{Eu}^{2+}$ .

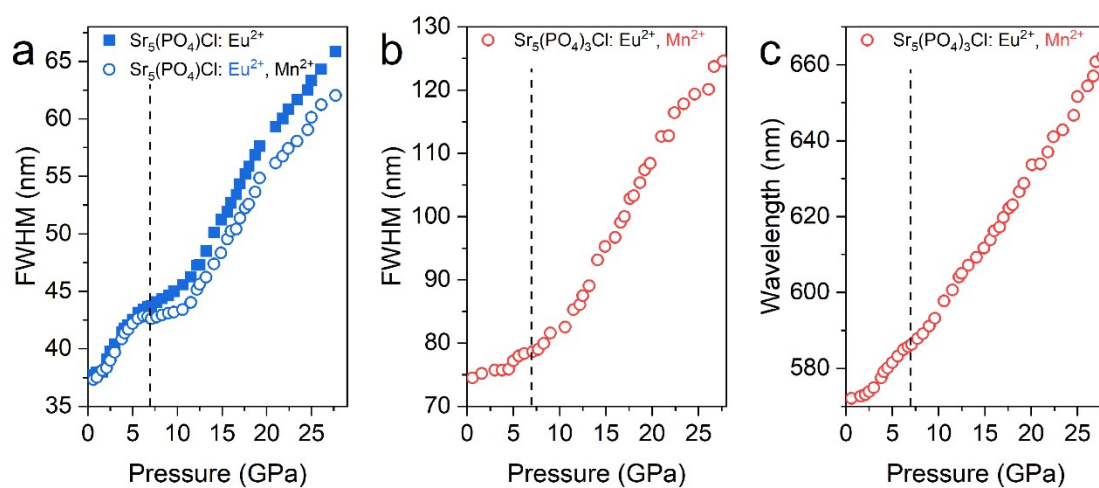

**Figure S3.** (a) The FWHM changes of  $\text{Eu}^{2+}$  for  $\text{Sr}_5(\text{PO}_4)_3\text{Cl}: 0.02\text{Eu}^{2+}, x\text{Mn}^{2+}$  ( $x=0$  and  $0.04$ ) under different hydrostatic pressures. The emission wavelength (b) and FWHM (c) changes of  $\text{Mn}^{2+}$  for  $\text{Sr}_5(\text{PO}_4)_3\text{Cl}: 0.02\text{Eu}^{2+}, 0.04\text{Mn}^{2+}$ .

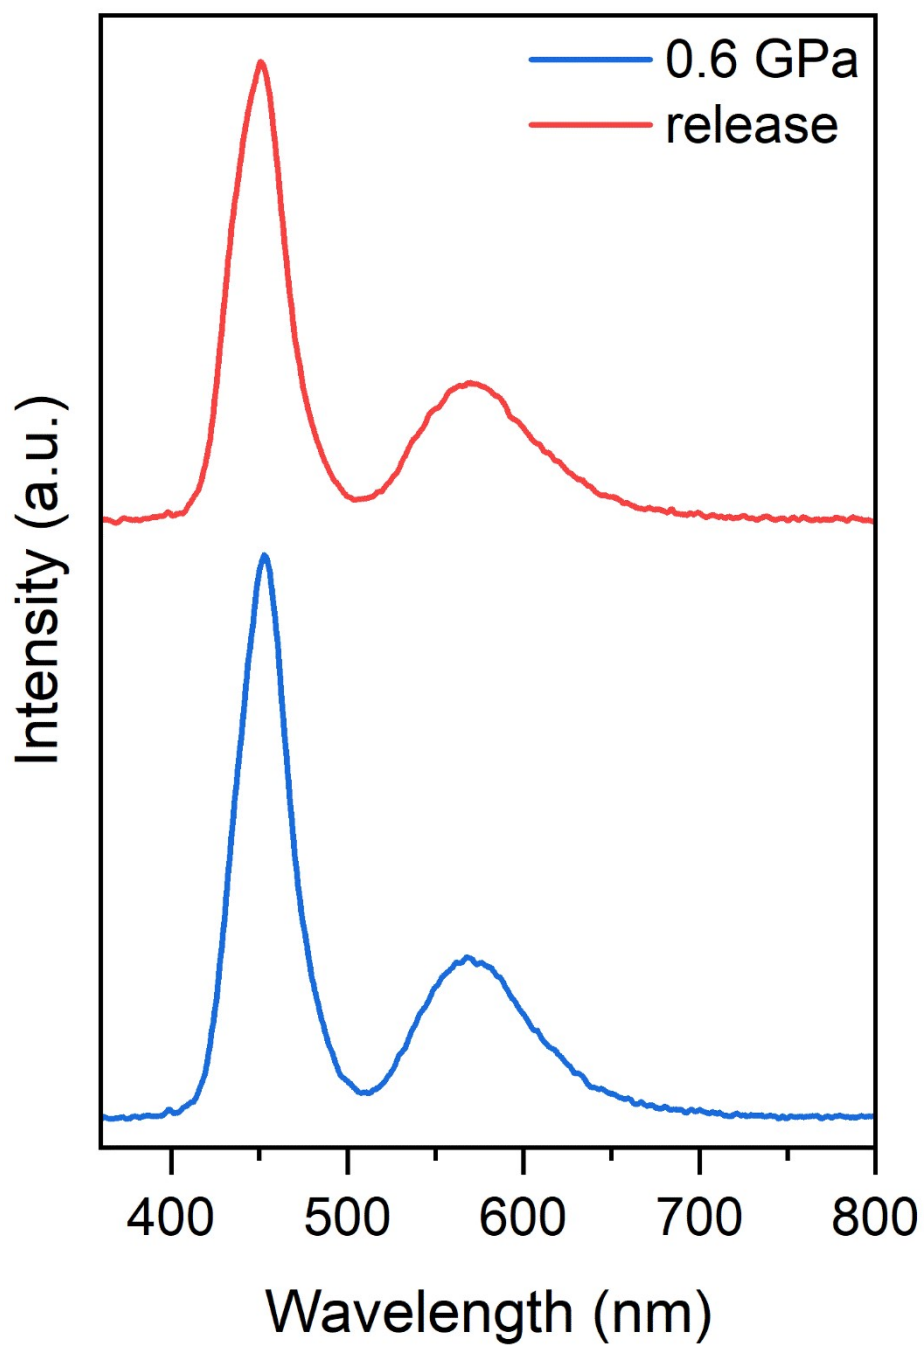

**Figure S4.** PL spectra of  $\text{Sr}_5(\text{PO}_4)_3\text{Cl}:0.02\text{Eu}^{2+}, 0.04\text{Mn}^{2+}$  at 0.6 GPa and after releasing pressure.

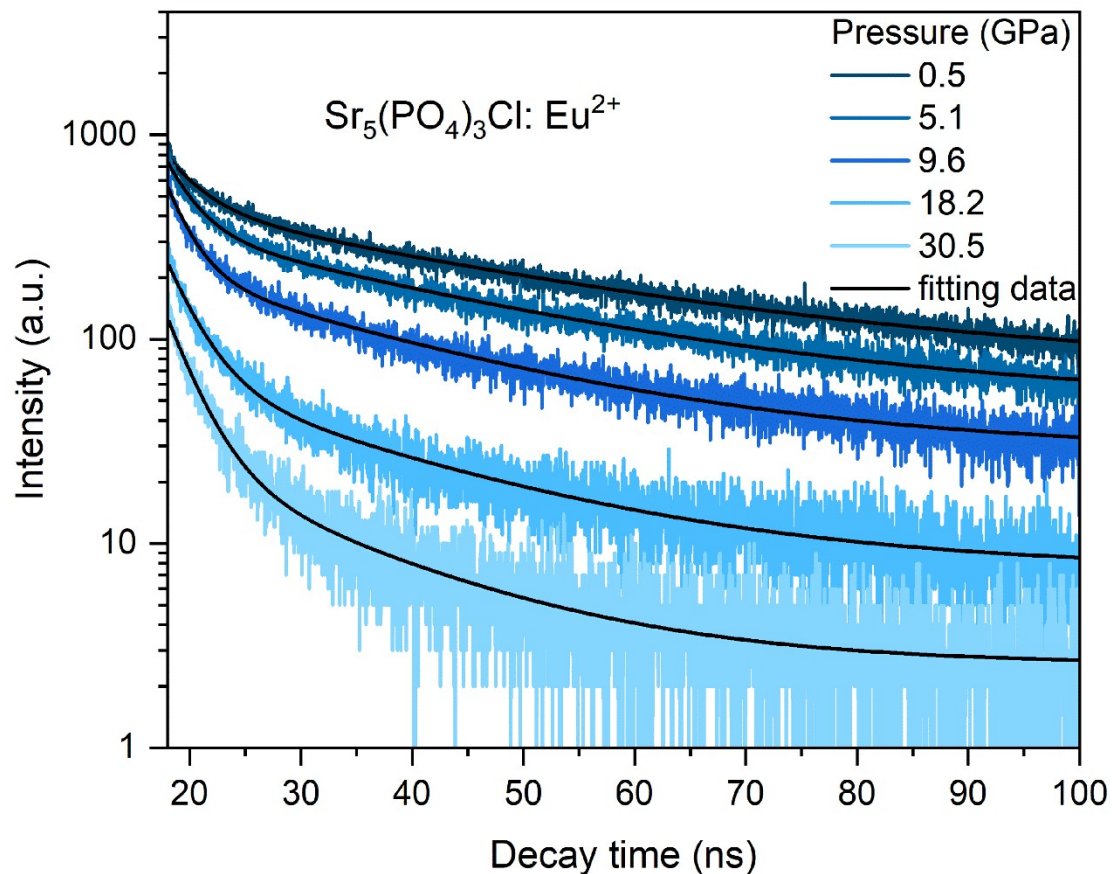

**Figure S5.** Decay time of  $\text{Sr}_5(\text{PO}_4)_3\text{Cl}: 0.02\text{Eu}^{2+}$  under different pressure.

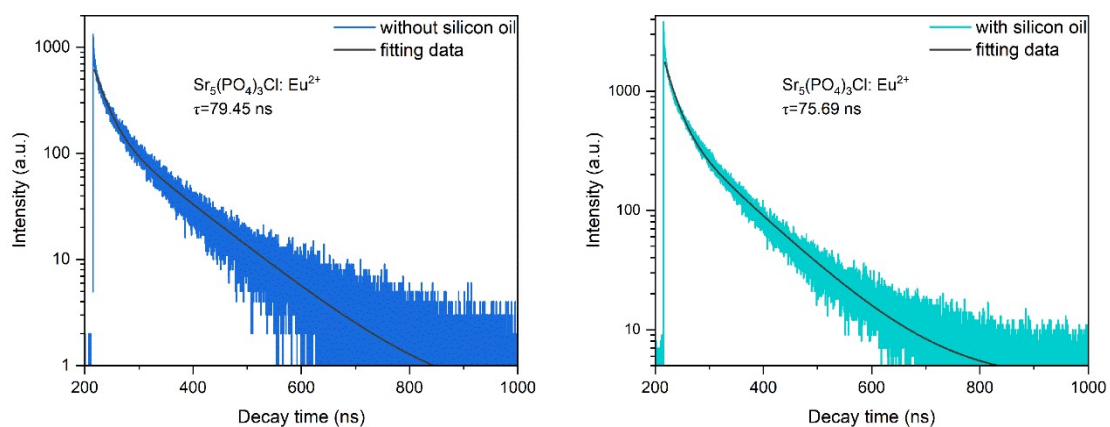

**Figure S6.** Decay time of  $\text{Sr}_5(\text{PO}_4)_3\text{Cl}: 0.02\text{Eu}^{2+}$  with and without silicon oil at ambient condition.

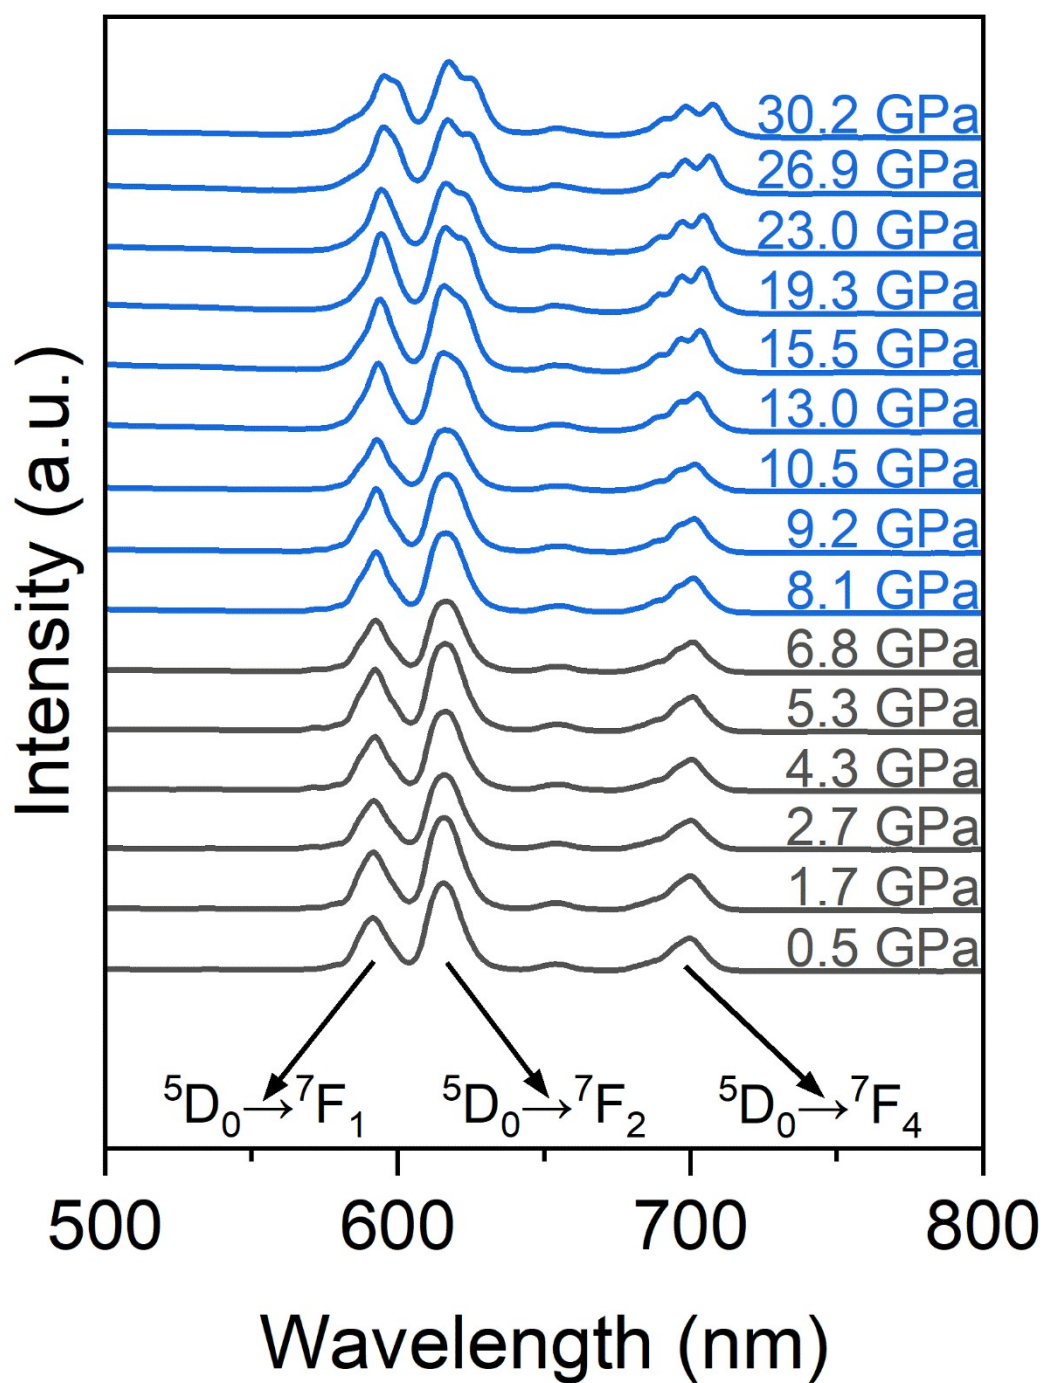

**Figure S7.** The emission spectra of  $\text{Sr}_5(\text{PO}_4)_3\text{Cl}: 0.005\text{Eu}^{3+}$  used as *in-situ* HP  $\text{Eu}^{3+}$  probe experiments.
